# Supplementary material
Source: Royal Society of Chemistry journal article supplement (doi:10.1039/d6ta03782h)
Supplement: d6ta03782h1.pdf [file d6ta03782h1.pdf]

## aSupplementary Information

### Mn-Doped Cobalt Phosphide Non-Noble Catalyst: Boosting HER for Stable and High-performance Zn-CO<sub>2</sub> system

*Yu Liao, <sup>a,b</sup> Yaowei Liu, <sup>a,b</sup> Yang Li, <sup>c</sup> Linjuan Zhang, <sup>a</sup> Jianqiang Wang, <sup>a</sup> Sivaprakash  
Sengodan, <sup>d</sup> Bingbing Niu, <sup>\*a,c</sup> and Guntae Kim <sup>\*a</sup>*

<sup>a</sup> Shanghai Institute of Applied Physics, Chinese Academy of Sciences, Shanghai  
201800, P. R. China

<sup>b</sup> University of Chinese Academy of Sciences, Beijing 100049, P. R. China

<sup>c</sup> School of Science, University of Science and Technology Liaoning, Anshan 114051,  
P. R. China

<sup>d</sup> Department of Mechanical and Nuclear Engineering Khalifa University, Abu Dhabi  
12788, United Arab Emirates

#### Table of Contents:

Supplementary Text  
Table S1 to S2  
Figure S1 to S14  
Video S1

---

\* Corresponding author. E-mail: [gtkim@sinap.ac.cn](mailto:gtkim@sinap.ac.cn) (G. Kim)

\* Corresponding author. E-mail: [niubb92@foxmail.com](mailto:niubb92@foxmail.com) (B. Niu)

**Calculation of the Faradaic Efficiency (FE):** The FE value ( $\eta$ ) was calculated by the following formulas:

$$n_{measured} = \frac{pV}{RT}$$

$$Q_{measured} = n_{measured} \cdot 2 \cdot F = \frac{pV}{RT} \cdot 2F$$

$$Q_{theoretical} = It$$

$$\eta = \frac{Q_{measured}}{Q_{theoretical}} \times 100\% = \frac{\frac{pV}{RT} \cdot 2F}{It} \times 100\% = \frac{pV \cdot 2F}{RT \cdot It} \times 100\%$$

where  $n_{measured}$  is the amount of produced H<sub>2</sub> (mol),  $Q$  is the quantity of electric charge (C),  $p$  is the hydrogen pressure (atm),  $V$  is the volume of produced H<sub>2</sub> (L),  $F$  is the Faraday constant (96485 C mol<sup>-1</sup>),  $R$  is the gas constant (0.082057 L·atm·mol<sup>-1</sup>·K<sup>-1</sup>),  $T$  is the operating temperature (K),  $I$  is the applied current (A),  $t$  is the duration of the test (s), and 2 represents the number of electrons transferred to produce a hydrogen molecule.

#### **Inductively Coupled Plasma Mass Spectrometry (ICP-MS):**

The bulk elemental composition of the Mn-CoP catalyst was determined by inductively coupled plasma mass spectrometry (ICP-MS). Approximately 10.0 mg of catalyst powder, detached from the 2 cm × 2.5 cm (5 cm<sup>2</sup>) NF substrate via ultrasonication, was accurately weighed and digested in a mixture of 1 mL concentrated HCl (37 wt%) and 3 mL concentrated HNO<sub>3</sub> (65 wt%) using microwave-assisted digestion (80 °C for 20 min). After cooling, the clear solution was diluted to 50 mL with ultrapure water. The mass loading of Mn-CoP on nickel foam was determined to be 2.0 mg cm<sup>-2</sup> (geometric area) by differential weighing. The 10.0 mg of powder used for ICP-MS analysis corresponds to approximately 5 cm<sup>2</sup> of electrode area. The measured bulk atomic ratio (≈ 9.04: 1.00: 1.43) is in good agreement with the surface EDS result (9.42: 1.00: 1.43).

Table S1. Elemental composition of Mn-CoP determined by ICP-MS (three parallel measurements)

| Sample  | Co (mg L <sup>-1</sup> ) | Mn (mg L <sup>-1</sup> ) | P (mg L <sup>-1</sup> ) | Atomic ratio (Co:Mn:P) |
|---------|--------------------------|--------------------------|-------------------------|------------------------|
| 1       | 18.92                    | 2.10                     | 4.42                    | 9.01:1.00:1.42         |
| 2       | 18.65                    | 2.05                     | 4.38                    | 9.09:1.00:1.44         |
| 3       | 18.78                    | 2.08                     | 4.40                    | 9.03:1.00:1.43         |
| Average | 18.78                    | 2.08                     | 4.40                    | 9.04:1.00:1.43         |

Table S2. Preliminary techno-economic assessment of the Zn-CO<sub>2</sub> system (1 m<sup>2</sup> electrode area, 300h), price reference source: <https://markets.businessinsider.com>, <https://www.dailymetalprice.com>, <https://carboncredits.com>, <https://www.eia.gov/outlooks/aeo>.

| Item                              | Quantity  | Unit Price (USD)      | Revenue/Cost (USD) |
|-----------------------------------|-----------|-----------------------|--------------------|
| Zn metal consumed                 | 366 kg    | 3.00 kg <sup>-1</sup> | -1,098             |
| ZnO recovered (net)               | 455.6 kg  | 2.2 kg <sup>-1</sup>  | +1,002             |
| KOH consumed                      | 628 kg    | 1.10 kg <sup>-1</sup> | -691               |
| KHCO <sub>3</sub> solid product   | 1,121 kg  | 1.25 kg <sup>-1</sup> | +1,401             |
| H <sub>2</sub> produced           | 11.2 kg   | 8.00 kg <sup>-1</sup> | +89.6              |
| Electricity generated             | 270 kWh   | 0.1 kWh <sup>-1</sup> | +27                |
| CO <sub>2</sub> captured (credit) | 0.493 ton | 5 ton <sup>-1</sup>   | +2.5               |
| Net result                        |           |                       | +733               |

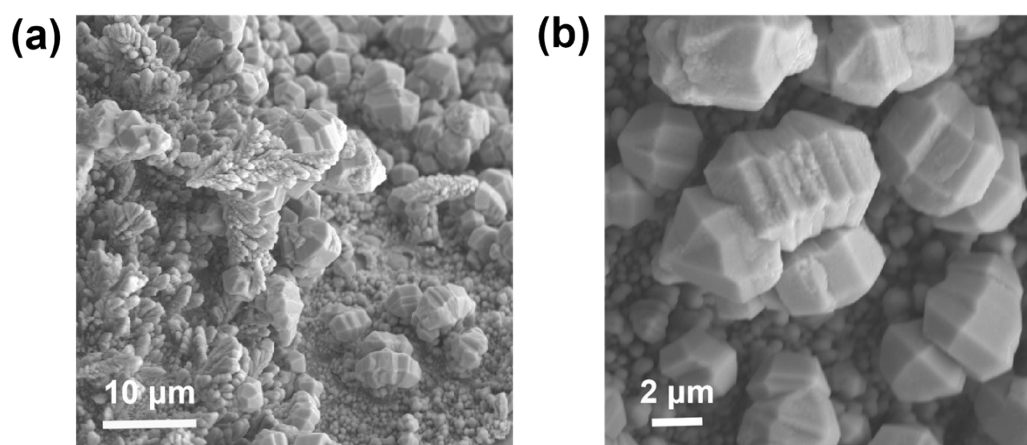

Figure S1. SEM images of CoP/NF at different magnifications of (a) 10 μm, (b) 2 μm.

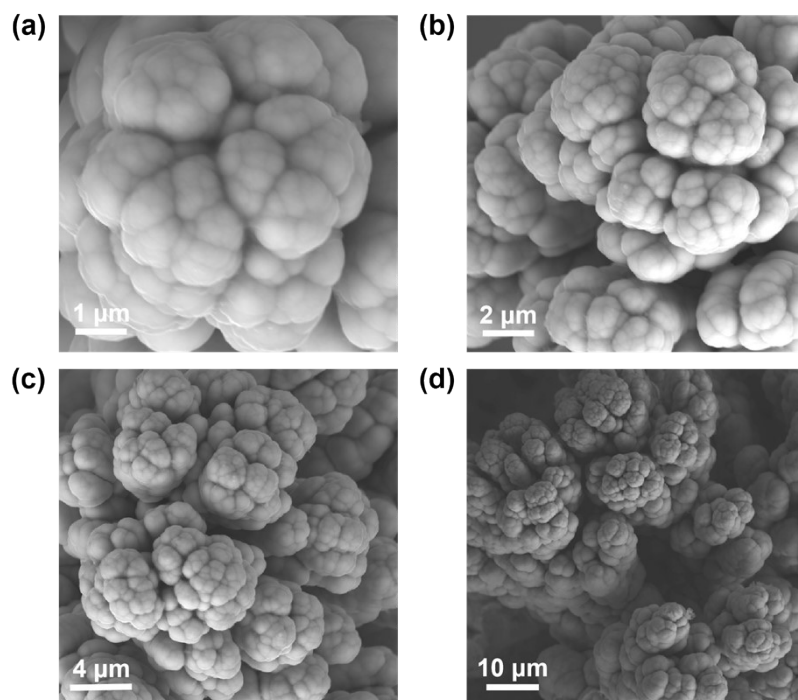

Figure S2. SEM images of Mn-CoP/NF at different magnifications of (a) 1 μm, (b) 2 μm, (c) 4 μm, (d) 10 μm.

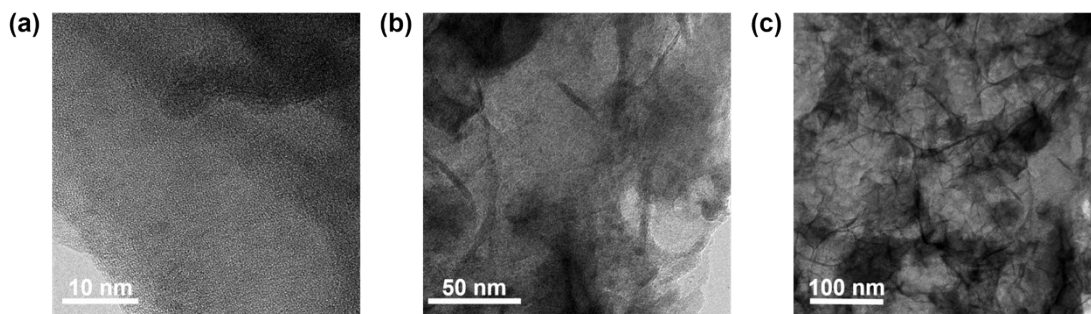

Figure S3. TEM images of Mn-CoP at different magnifications of (a) 10 nm, (b) 50 nm, (c) 100 nm.

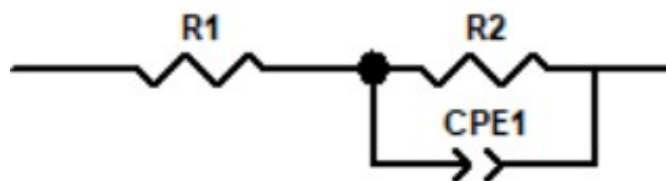

Figure S4. The equivalent circuit for EIS fitting.

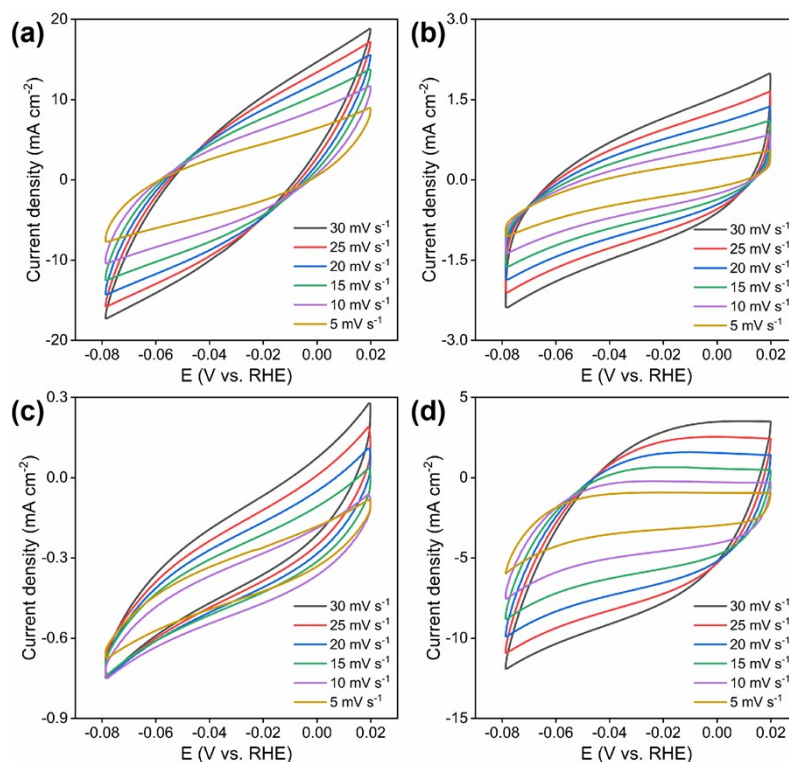

Figure S5. CV curves in the range of  $-0.08$  V to  $0.02$  V (vs. RHE) at different scan rates in  $3.4$  M  $\text{KHCO}_3$  solution. (a) Mn-CoP/NF, (b) CoP/NF, (c) Co/NF, and (d) Pt/C.

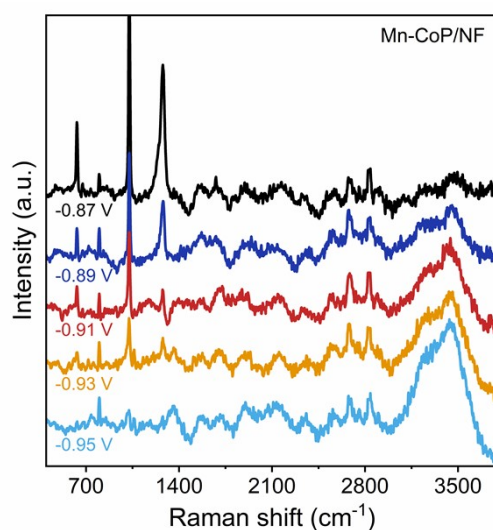

Figure S6. In-situ Raman spectra of Mn-CoP/NF recorded in  $3.4$  M  $\text{KHCO}_3$  electrolyte under HER conditions at various applied potentials (from  $-0.87$  to  $-0.95$  V vs. Ag/AgCl).

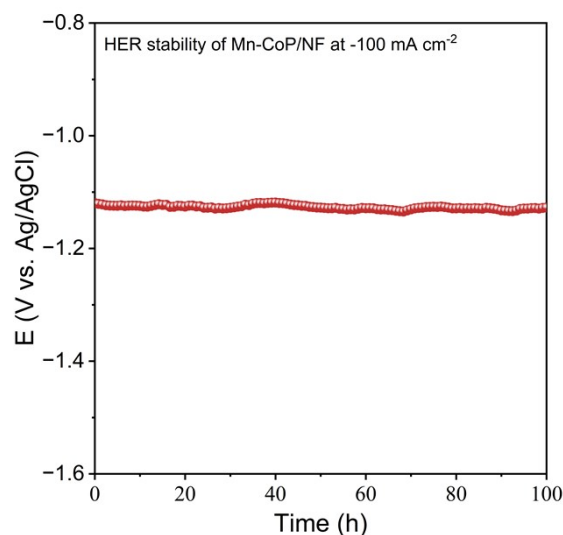

Figure S7. Chronopotentiometry test of Mn-CoP/NF at a constant cathodic current density of  $-100 \text{ mA cm}^{-2}$ .

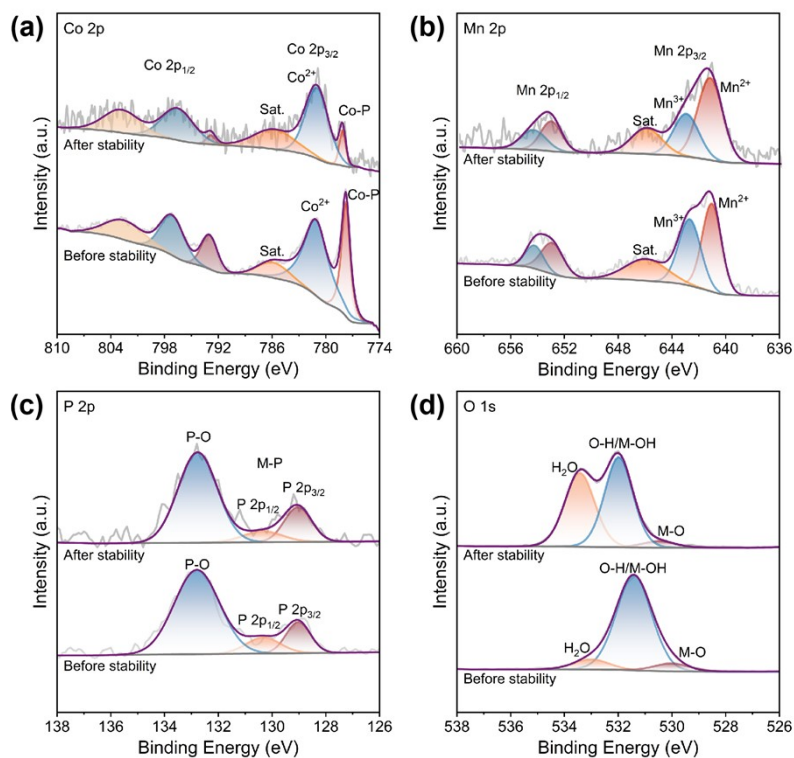

Figure S8. XPS spectra of Mn-CoP/NF before and after 100 h of continuous HER operation at  $-100 \text{ mA cm}^{-2}$  in  $3.4 \text{ M KHCO}_3$ . (a) Co 2p, (b) Mn 2p, (c) P 2p and (d) O 1s.

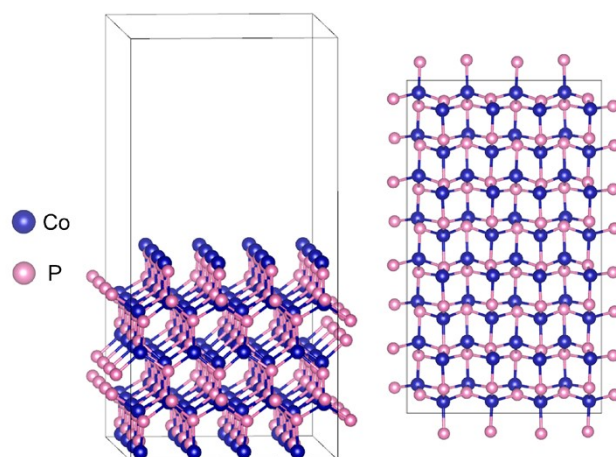

Figure S9. Schematic structure of CoP (001) lattice plane.

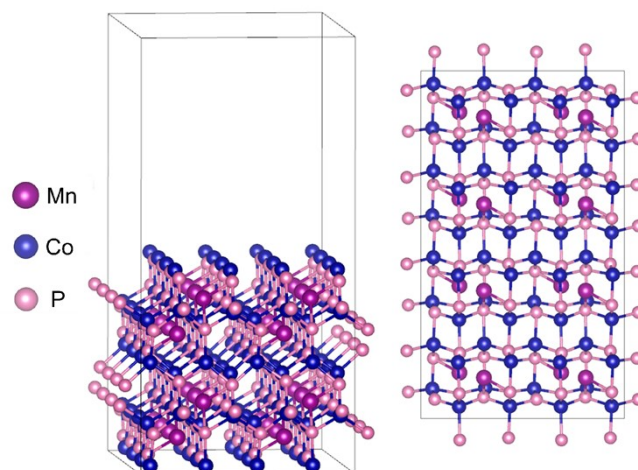

Figure S10. Schematic structure of Mn-CoP (001) lattice plane.

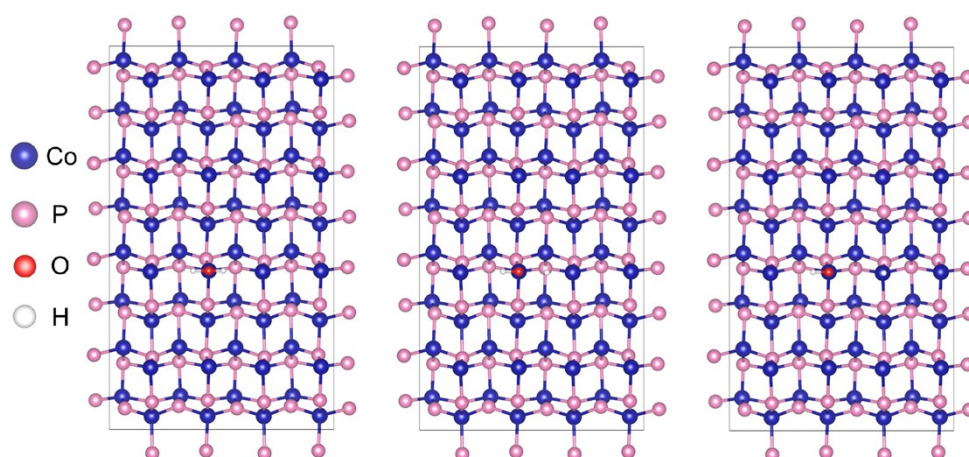

Figure S11. The atomic configurations of the intermediates on the (001) surface of CoP during water dissociation.

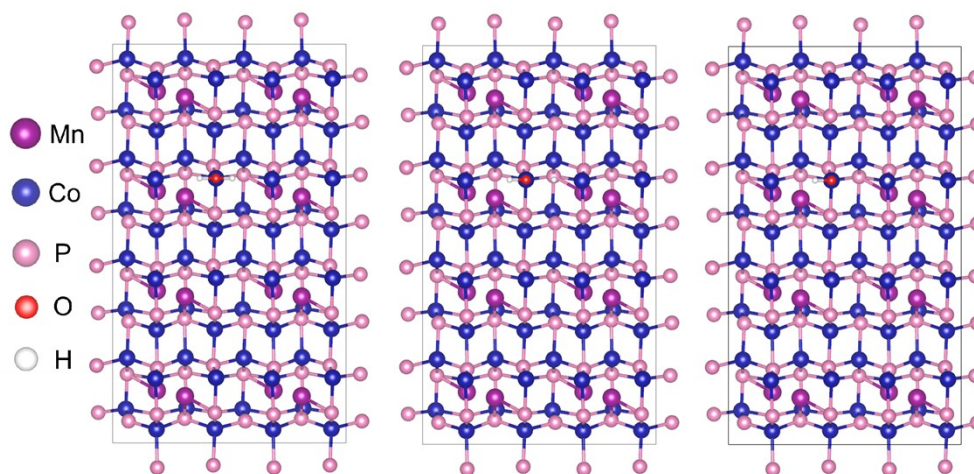

Figure S12. The atomic configurations of the intermediates on the (001) surface of Mn-CoP during water dissociation.

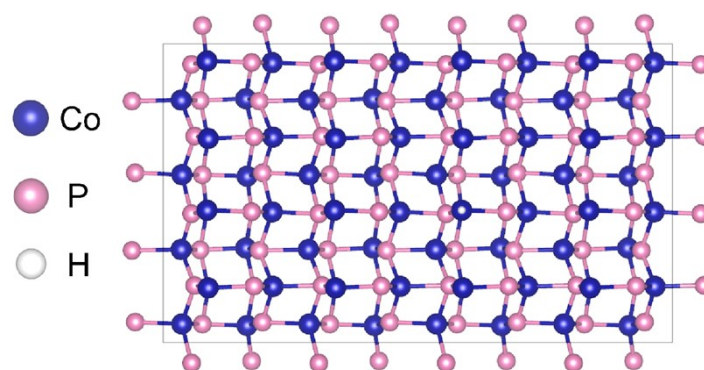

Figure S13. The atomic configurations of the H adsorption configuration of CoP.

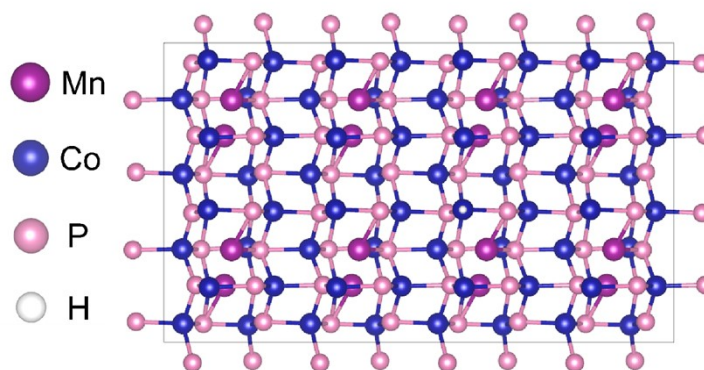

Figure S14. The atomic configurations of the H adsorption configuration of Mn-CoP.

**Caption for Video S1**

**Video S1.** The Zn-CO<sub>2</sub> system lighting LED board while generating H<sub>2</sub> gas (LED operate 1V)
